# Supplementary material
Source: PubMed Central journal article supplement (PMC5940322)
Supplement: ja7b01497_si_001.pdf [file ja7b01497_si_001.pdf]

# Supporting Information

Rerouting the Pathway for the Biosynthesis of the Side Ring System of Nosiheptide:  
The Roles of NosI, NosJ, and NosK

Edward D. Badding,<sup>1</sup> Tyler L. Grove,<sup>1,†</sup> Lauren Gadsby,<sup>5</sup> Joseph W. LaMattina,<sup>1</sup> Amie  
K. Boal,<sup>1,5,\*</sup> and Squire J. Booker<sup>1,5,#,\*</sup>

<sup>1</sup>The Department of Chemistry, <sup>5</sup>The Department of Biochemistry and Molecular Biology, and <sup>#</sup>The  
Howard Hughes Medical Institute, The Pennsylvania State University, University Park, Pennsylvania,  
16802, USA

The codon-optimized sequence of *nosI*, with the *NdeI* and *EcoRI* restriction sites  
indicated in bold type.

5'-CACTATAGGGCGAATTGAAGGAAGGCCGTCAAGGCCGCAT**CATATGGGTGATATGGG**  
TCGTCCGGCATTTCAGCGTTTTCTGACACCGCGTCATCTGCCTGCAGGTCGTGCCGGTGC  
AGTTACCGGTGTTCTGTTGGGGTGGTGAATTTGCAGCATGGGATGATCTGCTGACCGCAGG  
TCGCGATCTGGCAGCACAGGTTTCGTCCGGGTGGTGCCTATGCAATTGATCCGACAGCAGG  
TCTGCCTGCCCTGGCAGCCCTGTTTGCAGTTGCAACCGTTCGGATAACCGTCTGCTGTG  
GGCAAGTCCGCGTACCCTGGGTGTTACCGGTCGTGAAATTGCTCCGGCACTGCATGCCCT  
GCCGGATGATGGTAGCGTTCGGCTGGCAGCGCAAGAACGTCCGCTGTGGGGTGTGGTGTAC  
CAGCGGTAGCAGTGGTGCACCGAAAGTTGCAGTTGGTCCGGCAGATGAATGGGAGCAGA  
TTGCCCTGCATGCCGAAGCAGCAATGTATGCAGATGCATTTCCGGCAGGTCGCCTGAAG  
CACTGGCAACCTGTCTGCCGCTGGGTTTTAGCGCAGCCTTTTTTATGTGTGTTCTGCCAG  
CACTGTATCTGAAACGTGATCTGGTTGTTTCATCCGCCTCATGATTGGAGTCCGCTGTATG  
ATCTGGCACGTGATCGTCGTGTTCTGGCACTGGGTGTTCCAGCTCTGGCAGCCGCAGCAT  
GTCTGAGCGCACCGGCAGCAACCGATCTGGGTAGCGTTGCACTGTTTCTGGGTGGTGGTC  
ATCTGAGTGCACCGCGTGTGAACTGATTCGTGTCATTTTACCGGTGCAGCAGTTAGCA  
ATCTGTATGGCACCGCAGAAACCGGTGCAATTGCCCTGGATCACGATCCGGGTCATAATC  
GTCATGTTGGTCGTCCGATTCCGGGTAAGCGTTTTGGCTGACCGGCACCGATGAACGTG  
GTATTGGCACCGTTGCCGTTGCAGGTCGGGTTGTTGTCGTCTACCTGGCGTCCGGGTA  
GCCCTCCGAGTGCCCTGCAGATCATGTGACCGGTACAGATTATGGTCTGTTTTGATGCAG  
ATGGTAATCTGTGTCTGGAAGGTCGTCTGGATGGTGCAGAAAACTGGCAGGCGTTCTG  
GTGCGTCCGCGTGAAATCGAACGTCATGTGCTGGCCCTGGATGGCGTTAGTGATGTTCTG  
GTTACCGTTGAAACCGCACCGACCGGTCTGGAATTTCTGGCAGCGACCGTTGTTGGTAGC  
GTGGATGCAGATACCGTGCGTGCACATTGTGCGGCACTGCCGGAACAGCATCGTCCGAGC  
CGTATTAGCTGTGCAAGCGAACAAGAAGCAGCCACCGTTTATAGCGCACATGGTAAACTG  
TAAGAAT**T**CCTGGGCCTCATGGGCCTTCCTTTC**A**CTGCCCGCTTCCAG-3'

The codon-optimized sequence of the *nosJ* gene. The *NdeI* and *EcoRI* restriction sites are indicated in bold type.

5'-CGAATTGGCGGAAGGCCGTCAAGGCCACGTGTCTTGTCCAGAGCT**CCATATG**ACCAGC  
CAGCGTACCACACCGCGTACACCGGATGGTGTTCGGATCTGCAAGAAGAAGTGGCAGGT  
CTGCTGCAAGAGGATGATCCGCGTCGTCTGGATAGCCTGGAAACCGTTGTTGTTCTG  
AGCTATTTTGCACGTCAGGCACCGGGTTCGTACCCTGCCGGAAGTGGCGGATGCTCCGCGT  
ACCATTGAAGGTTGGGTTACCTGGGCAGATCAGCGTAGCAGCGCAAGCTA**AGAATT**CGG  
TACCTGGAGCACAAGACTGGCCTCATGGGCCTTCCGCTCACTGC-3'

The codon-optimized sequence of *nosK*, with the *NdeI* and *EcoRI* restriction sites indicated in bold type.

5'-  
CGAATTGGCGGAAGGCCGTCAAGGCCACGTGTCTTGTCCAGAGCT**CCATATG**GATGCAG  
AAACCCCGATGGATAACCGAAACACCGCGTGATACGGAAACGCCGATGCATACAGGTATGA  
GCACCGGTCCGAAACACCGACCGTTTATCTGGTTCATGGTCTGCTGGGCACCGGTCATG  
GTCATTTTGCAGCACAGATTTCGTGCATGGCATGGTTCGTCTGCGTACCGTTCCGGTTGATC  
TGCCTGGTCATGGCCGTTGTCGTCTGATGCAGCCGAAGATTATTTGATGATGCACTGC  
GTTATCTGGTGGCAGTTCTGGAACGTTTTGGTCCGGGTCGTCTGATTGGTGCAAGCTATC  
TGGGTGGTCCGCTGGCACATCGTTGTGCAGCAACCCGTCCGGATCTGGTTAGCAGCCTGG  
TTCTGACCGTTTTTGCACCGGATGTTAGCCGTGATGCATTTCTGAGCCTGATTGCAGGTT  
TTGAAGGTCTGGCAGCACAGCAGCCTGCACTGGCAGCAGAATATGAACAGCTGCATGGCA  
CCCGTTGGAAACGTACCCTGGATGCAGTTACAGGTCATGTTGAACGTGATTTTGAACGTA  
CCGCACTGGTTCGTGCAGCAGATGTTGCAGCACTGACCGTCCGACCCTGGTGCTGAATG  
GTAGCCTGAAAAGCGTGGAACGTGCAGCCGAGAACAGGCACCGGGTGGGGTGGTTCGT  
GTTTCGTGGTCGCGTTGTTCCGGGTGCAGGTCATCTGGTTGGTTCATGATCGTCCGCGTGAA  
TTTAATGAAGCAGTTGAAGATTTTTGGCGCACCGCACATGATGCACCGGCAGGTCCGCGT  
ACCACACAGAAAGGTGATAC**CGAATT**CGGTACCTGGAGCACAAGACTGGCCTCATGGGC  
CTTCCGCTCACTGC-3'

**Figure S1.** Purification of NosJ. Lanes 1 and 6, molecular mass markers (kDa); lane 2, crude extract; lane 3, pellet; lane 4, flow through from DE-52 column; lane 5, wash from DE-52 column; lane 6, pooled protein from DE-52 column; lane 7, post S-200 column.

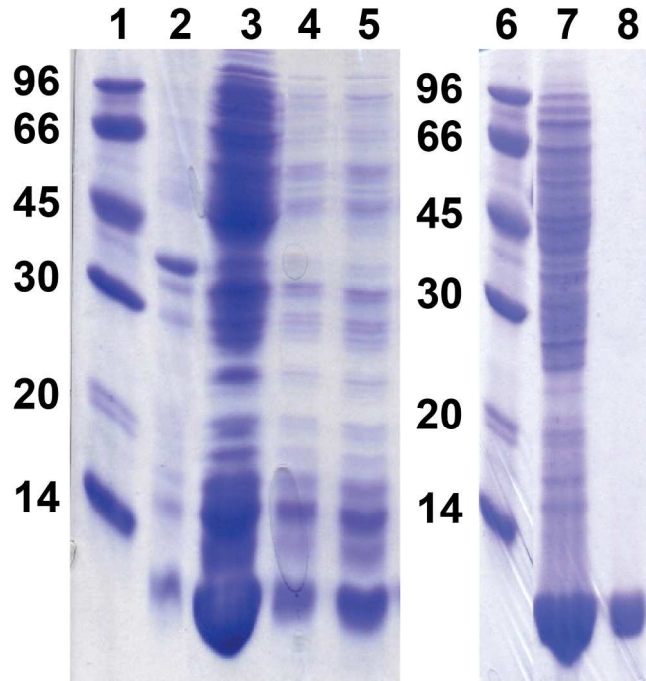

**Figure S2.** Purification of NosI. Lane 1, molecular mass markers (kDa); lane 2, pellet; lane 3, crude extract; lane 4, flow through from Talon Co(2+) column; lane 5, wash from Talon Co(2+) column; lane 6, second wash from Talon Co(2+) column; lanes 7 and 8, eluted protein at 2 different concentrations.

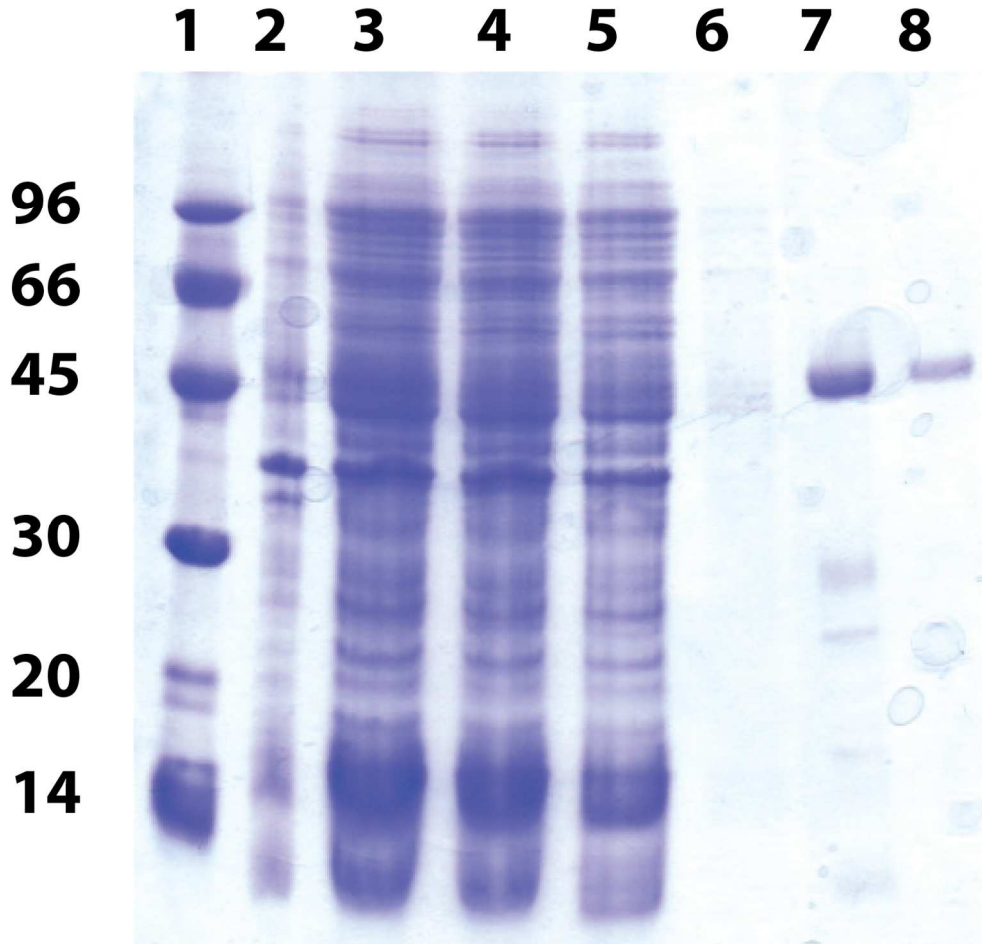

**Figure S3.** Overproduction and purification of NosK. Lane 1, molecular mass markers (kDa); lane 2, before IPTG induction; lane 3, after IPTG induction; lane 4, pellet; lane 5, crude extract; lane 6, flow through from Talon Co(2<sup>+</sup>) column; lane 7, wash from Talon Co(2<sup>+</sup>) column; lane 8, second wash from Talon Co(2<sup>+</sup>) column; lanes 9 and 10, eluted protein at 2 different concentrations.

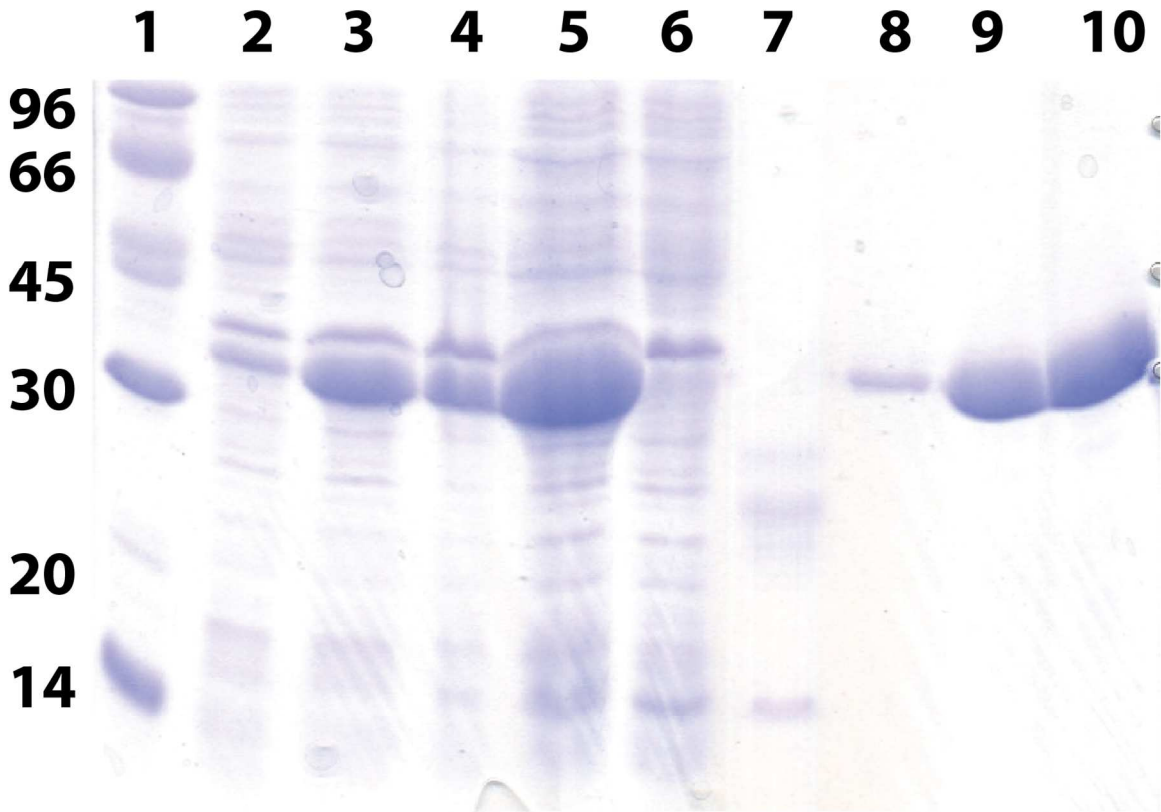

**Figure S4.** Overlay of the catalytic triad acidic residue loop in NosK and valacyclovirase (2OCG PDB accession code).

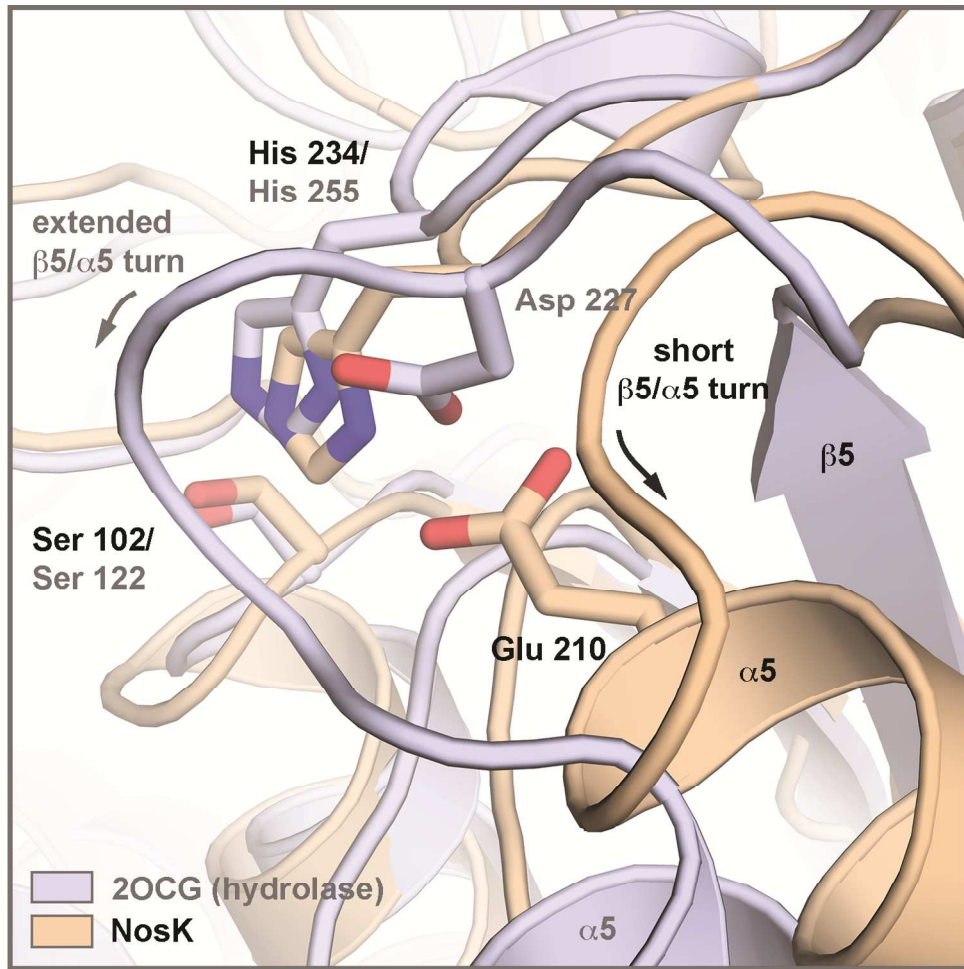

**Figure S5.** Electrostatic surface potential map for NosK. Surface contoured at + 5  $k_B T$  (blue) and -5  $k_B T$  (red). Corresponding cartoon representations for each view are shown in the bottom panels.

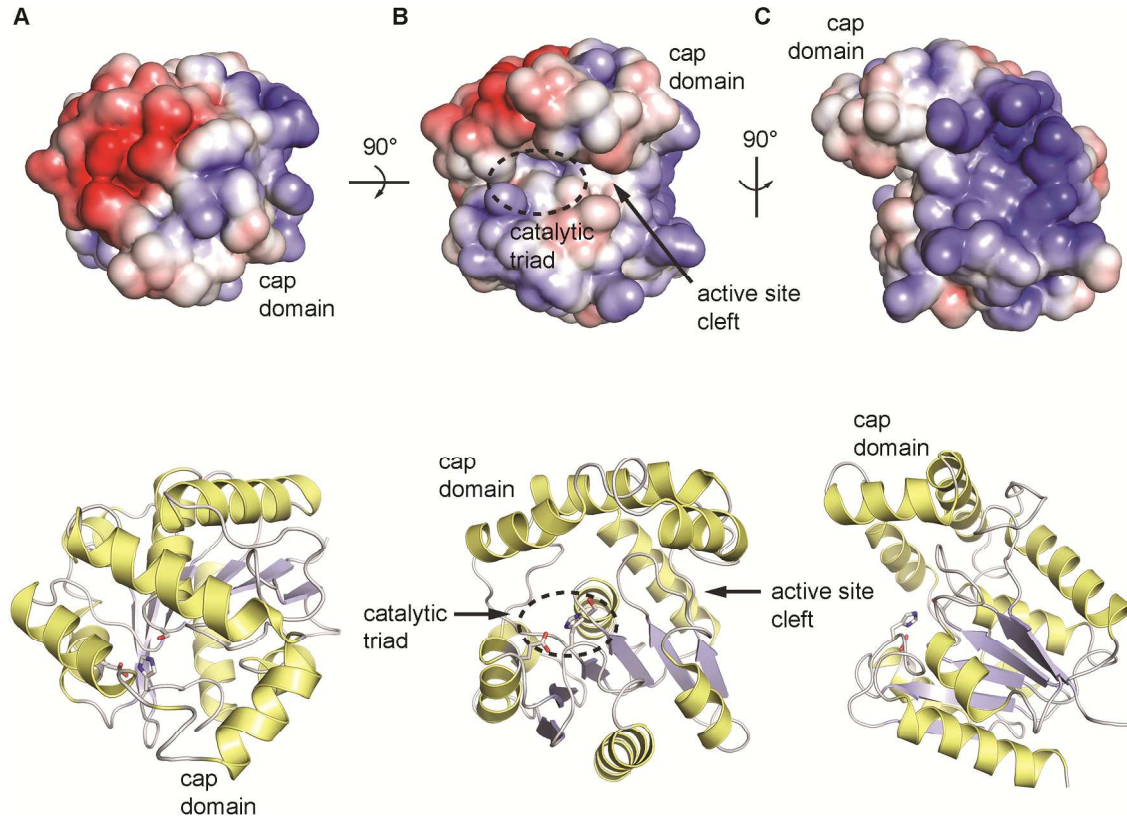

**Table S1.** Fragments from NosK trypsin digestion after treatment with NosJ, NosI, MIA, ATP, CoA, and holo ACP synthase. Highlighted in blue are the peptide fragments containing Ser102.

| Sequence                                                  | # PSMs | # Proteins | # Protein Groups | Protein Group Accessions | Modifications                                 |
|-----------------------------------------------------------|--------|------------|------------------|--------------------------|-----------------------------------------------|
| DTETPmHTGMSTGPETPTVYL VHGLLGTGHGHF AAQIR                  | 8      | 1          | 1                | C6FX50                   | M6(Oxidation)                                 |
| DAFLSLIAGFEGLAQQPALAAEYEQ LHGTR                           | 101    | 1          | 1                | C6FX50                   |                                               |
| AADVAALTVP TLV L n G S L K                                | 41     | 1          | 1                | C6FX50                   | N15(Deamidated)                               |
| DAFLSLIAGFEGLAQQPALAAEYEQ LHGTR                           | 3      | 1          | 1                | C6FX50                   | Q17(Deamidated)                               |
| DTETPMHTGMSTGPETPTVYL VHGLLGTGHGHF AAQIR                  | 3      | 1          | 1                | C6FX50                   |                                               |
| DTETPmHTGmSTGPETPTVYL VHGLLGTGHGHF AAQIR                  | 11     | 1          | 1                | C6FX50                   | M6(Oxidation); M10(Oxidation)                 |
| cAATRPDLVSSLVLTGFAPDVSR                                   | 61     | 1          | 1                | C6FX50                   | C1(Carbamidomethyl)                           |
| AADVAALTVP TLV L n G S L K                                | 47     | 1          | 1                | C6FX50                   |                                               |
| DAFLSLIAGFEGLAQQPALAAEYEQ LHGTRWK                         | 2      | 1          | 1                | C6FX50                   |                                               |
| FGPGR LIGASYLGGPLAHR                                      | 8      | 1          | 1                | C6FX50                   | S10(Ser-MIA)                                  |
| AADVAALTVP TLV L n G S L K S V E R                        | 1      | 1          | 1                | C6FX50                   | N15(Deamidated)                               |
| EFNEAVEDFWR                                               | 82     | 1          | 1                | C6FX50                   |                                               |
| DFERTALVRAADVAALTVPTLV L n G S L K                        | 2      | 1          | 1                | C6FX50                   |                                               |
| LIGASYLGGPLAHR                                            | 41     | 1          | 1                | C6FX50                   | S5(Ser-MIA)                                   |
| DAAEDYFDDALR                                              | 24     | 1          | 1                | C6FX50                   |                                               |
| YLVAVLERFGPGR LIGASYLGGPLAHR                              | 5      | 1          | 1                | C6FX50                   | S18(Ser-MIA)                                  |
| TALVRAADVAALTVPTLV L n G S L K                            | 2      | 1          | 1                | C6FX50                   |                                               |
| LIGASYLGGPLAHRcAATRPDLVSSLVLTGFAPDV SR                    | 5      | 1          | 1                | C6FX50                   |                                               |
| DTETPmHTGmSTGPETPTVYL VHGLLGTGHGHF AAQIRAWHGRLR           | 1      | 1          | 1                | C6FX50                   | M6(Oxidation); M10(Oxidation)                 |
| AADVAALTVP TLV L n G S L K S V E R                        | 2      | 1          | 1                | C6FX50                   |                                               |
| LIGASYLGGPLAHRcAATRPDLVSSLVLTGFAPDV SR                    | 3      | 1          | 1                | C6FX50                   | C15(Carbamidomethyl)                          |
| AAAEQAPGWGGR                                              | 5      | 1          | 1                | C6FX50                   |                                               |
| DFERTALVRAADVAALTVPTLV L n G S L K                        | 3      | 1          | 1                | C6FX50                   | N24(Deamidated)                               |
| AADVAALTVP TLV L n G S L K S V E R A A A E Q A P G W G GR | 3      | 1          | 1                | C6FX50                   |                                               |
| DTETPMHTGmsTGPETPTVYL VHGLLGTGHGHF AAqIR                  | 1      | 1          | 1                | C6FX50                   | M10(Oxidation); S11(Ser-MIA); Q36(Deamidated) |
| YLVAVLER                                                  | 1      | 1          | 1                | C6FX50                   |                                               |
| TLDAVTGHVER                                               | 2      | 1          | 1                | C6FX50                   |                                               |
| TLDAVTGHVERDFER                                           | 1      | 1          | 1                | C6FX50                   |                                               |



**Table S2.** Fragments from NosK trypsin digestion after treatment with NosJ, MIA, ATP, CoA, and holo ACP synthase (NosI omitted). Highlighted in blue are the peptide fragments containing Ser102.

| Sequence                                       | # PSMs | # Proteins | # Protein Groups | Protein Group Accessions | Modifications                                  |
|------------------------------------------------|--------|------------|------------------|--------------------------|------------------------------------------------|
| DAFLSLIAGFEGLAQQPALAAEYQLHGTR                  | 116    | 1          | 1                | C6FX50                   |                                                |
| DTETPmHTGmSTGPETPTVYLVHGLLGTGHGHF AAQIR        | 8      | 1          | 1                | C6FX50                   | M6(Oxidation); M10(Oxidation)                  |
| AADVAALTVPRTLVLNGLSK                           | 82     | 1          | 1                | C6FX50                   |                                                |
| DAFLSLIAGFEGLAQQPALAAEYQLHGTRWK                | 3      | 1          | 1                | C6FX50                   |                                                |
| AADVAALTVPRTLVLNGLSK                           | 14     | 1          | 1                | C6FX50                   | N15(Deamidated)                                |
| cAATRPDLVSSSLVLTGFAPDVSR                       | 31     | 1          | 1                | C6FX50                   | C1(Carbamidomethyl)                            |
| DTETPmHTGmSTGPETPTVYLVHGLLGTGHGHF AAqIRAWHGR   | 2      | 1          | 1                | C6FX50                   | M6(Oxidation);M10(Oxidation); Q36(Deamidated)  |
| GRVVPGAGHLVGHDRPREFNEAVEDFWR                   | 1      | 1          | 1                | C6FX50                   |                                                |
| LIGASYLGGPLAHRcAATRPDLVSSSLVLTGFAPDV SR        | 2      | 1          | 1                | C6FX50                   | C15(Carbamidomethyl)                           |
| AADVAALTVPRTLVLNGLSKSVER                       | 3      | 1          | 1                | C6FX50                   |                                                |
| LIGASYLGGPLAHRcAATRPDLVSSSLVLTGFAPDV SR        | 7      | 1          | 1                | C6FX50                   |                                                |
| EFNEAVEDFWR                                    | 70     | 1          | 1                | C6FX50                   |                                                |
| AADVAALTVPRTLVLNGLSKSVERAAEQAPGWG GR           | 3      | 1          | 1                | C6FX50                   |                                                |
| DFERTALVRAADVAALTVPRTLVLNGLSK                  | 2      | 1          | 1                | C6FX50                   |                                                |
| DAAEDYFDDALR                                   | 20     | 1          | 1                | C6FX50                   |                                                |
| AADVAALTVPRTLVLNGLSKSVER                       | 1      | 1          | 1                | C6FX50                   | N15(Deamidated)                                |
| DAFLSLIAGFEGLAQQPALAAEYQLHGTRWKR               | 3      | 1          | 1                | C6FX50                   |                                                |
| DTETPmHTGmSTGPETPTVYLVHGLLGTGHGHF AAQIRAWHGRLR | 3      | 1          | 1                | C6FX50                   | M6(Oxidation); M10(Oxidation)                  |
| DTETPmHTGmSTGPETPTVYLVHGLLGTGHGHF AAqIR        | 1      | 1          | 1                | C6FX50                   | M6(Oxidation); M10(Oxidation); Q36(Deamidated) |
| TALVRAADVAALTVPRTLVLNGLSK                      | 2      | 1          | 1                | C6FX50                   |                                                |
| LIGASYLGGPLAHR                                 | 1      | 1          | 1                | C6FX50                   |                                                |
| DTETPmHTGmSTGPETPTVYLVHGLLGTGHGHF AAqIRAWHGRLR | 1      | 1          | 1                | C6FX50                   | M6(Oxidation); M10(Oxidation); Q36(Deamidated) |
| YLVAVLER                                       | 3      | 1          | 1                | C6FX50                   |                                                |
| AAAEQAPGWGGR                                   | 5      | 1          | 1                | C6FX50                   |                                                |
| AADVAALTVPRTLVLNGLSKSVERAAEQAPGWG GR           | 1      | 1          | 1                | C6FX50                   | N15(Deamidated)                                |
| DTETPmHTGMSTGPETPTVYLVHGLLGTGHGHF AAQIR        | 5      | 1          | 1                | C6FX50                   | M6(Oxidation)                                  |
| TLDAVTGHVERDFER                                | 1      | 1          | 1                | C6FX50                   |                                                |
| TLDAVTGHVER                                    | 2      | 1          | 1                | C6FX50                   |                                                |

**Table S3. Crystallographic data collection and refinement statistics for NosK (PDB accession code 5V7O)**

| <b>Data Collection</b>               |                        |
|--------------------------------------|------------------------|
| Resolution (Å)                       | 28.00-2.30 (2.38-2.30) |
| Space group                          | $P3_121$               |
| Cell dimensions                      |                        |
| a, b, c (Å)                          | 75.29, 75.29, 110.12   |
| $\alpha$ , $\beta$ , $\gamma$ (°)    | 90, 90, 120            |
| Redundancy                           | 10.8 (11.1)            |
| Completeness (%)                     | 99.9 (100)             |
| $I/\sigma I$                         | 13.31 (2.62)           |
| Wilson $B$ -factor (Å <sup>2</sup> ) | 33.96                  |
| $R_{\text{sym}}$                     | 0.040 (0.252)          |
| $R_{\text{pim}}$                     | 0.057 (0.356)          |
| $CC_{1/2}$                           | 0.997 (0.936)          |
| <b>Refinement</b>                    |                        |
| Resolution (Å)                       | 28.00-2.30 (2.38-2.30) |
| No. reflections                      | 16453                  |
| $R_{\text{work}} / R_{\text{free}}$  | 0.22/0.26              |
| No. atoms                            | 1858                   |
| Protein                              | 1762                   |
| Ligand/ion                           | 5                      |
| Water                                | 230                    |
| rms deviations                       |                        |
| bond lengths (Å)                     | 0.007                  |
| bond angles (°)                      | 0.87                   |
| Ramachandran analysis                |                        |
| Favored (%)                          | 98                     |
| Allowed (%)                          | 2.2                    |
| Outliers (%)                         | 0                      |
| $B$ -factor (Å <sup>2</sup> )        |                        |
| Protein                              | 41.84                  |
| Ligands/ion                          | 35.19                  |
| Water                                | 43.34                  |

Statistics for the highest-resolution shell are shown in parentheses.
